# Supplementary material for: Learning Curves in Open, Laparoscopic, and Robotic Pancreatic Surgery: A Systematic Review and Proposal of a Standardization
Source: PubMed Central journal article supplement — Ann Surg Open. 2022 Jan 27;3(1):e111. doi: 10.1097/AS9.0000000000000111 (PMC10431463; doi:10.1097/as9.0000000000000111), 2022-01-27
Supplement: as9-3-e111-s001.pdf [file as9-3-e111-s001.pdf]

**Supplementary Table 1: Risk of bias assessment within the included studies.**

|                                           | Reporting | Selection of participants | Statistical tests | Data dredging | Deviations of intended interventions | Measurement of outcomes | Selection bias | Overall bias |
|-------------------------------------------|-----------|---------------------------|-------------------|---------------|--------------------------------------|-------------------------|----------------|--------------|
| <b>Open pancreatoduodenectomy</b>         |           |                           |                   |               |                                      |                         |                |              |
| Cameron et al. 2006                       | Low       | Low                       | Low               | Low           | Low                                  | Low                     | Low            | Low          |
| Coe et al. 2015                           | Low       | Low                       | Low               | Low           | Low                                  | Low                     | Moderate       | Moderate     |
| Ecker et al. 2018                         | Low       | Low                       | Low               | Low           | Low                                  | Low                     | Low            | Low          |
| Fisher et al. 2012                        | Moderate  | Low                       | Low               | Low           | Low                                  | Low                     | Low            | Moderate     |
| Hardacre et al. 2010                      | Moderate  | Low                       | Low               | Moderate      | Low                                  | Low                     | Low            | Moderate     |
| Noda et al. 2012                          | Moderate  | Low                       | Low               | Low           | Low                                  | Moderate                | Low            | Moderate     |
| Park et al. 2020                          | Low       | Low                       | Low               | Low           | Low                                  | Low                     | Low            | Low          |
| Relles et al. 2013                        | High      | Low                       | Moderate          | Low           | Moderate                             | n.a.                    | Low            | High         |
| Roberts et al. 2020                       | Low       | Low                       | Moderate          | Low           | Low                                  | Low                     | Low            | Moderate     |
| Schmidt et al. 2010                       | Moderate  | Low                       | Low               | Low           | Low                                  | Low                     | Low            | Moderate     |
| Tsamalaidze et al. 2018                   | Moderate  | Low                       | Low               | Low           | Low                                  | Low                     | Low            | Moderate     |
| Tseng et al. 2007                         | Low       | Moderate                  | Low               | Low           | Low                                  | Low                     | Low            | Moderate     |
| <b>Laparoscopic pancreatoduodenectomy</b> |           |                           |                   |               |                                      |                         |                |              |
| Choi et al. 2020                          | Low       | Low                       | Low               | Low           | Low                                  | Low                     | Low            | Low          |
| Dokmak et al. 2017                        | Low       | Low                       | Low               | Low           | Low                                  | Low                     | Low            | Low          |
| Huang et al. 2020                         | Low       | High                      | Low               | Low           | Low                                  | Low                     | Low            | High         |
| Ke et al. 2020                            | Low       | High                      | Low               | Low           | Low                                  | Low                     | Low            | High         |
| Kim et al. 2012                           | Low       | Low                       | Low               | Low           | Low                                  | Moderate                | Low            | Moderate     |
| Kim et al. 2020                           | Low       | Moderate                  | Low               | Low           | Low                                  | Low                     | Low            | Moderate     |
| Kuroki et al. 2014                        | Low       | Low                       | Low               | Low           | Low                                  | Low                     | Low            | Low          |
| Liao et al. 2017                          | Low       | Moderate                  | Low               | Moderate      | Low                                  | Moderate                | Low            | Moderate     |
| Lu et al. 2016                            | Low       | Low                       | Low               | Low           | Low                                  | Moderate                | Low            | Moderate     |
| Morato et al. 2020                        | Low       | High                      | Low               | Low           | Low                                  | Low                     | Low            | High         |
| Nagakawa et al. 2018                      | Low       | Low                       | Low               | Low           | Low                                  | Low                     | Low            | Low          |
| Nieuwenhuijs et al. 2020                  | Moderate  | Low                       | Low               | Low           | Moderate                             | Low                     | Low            | Moderate     |
| Song et al. 2020                          | Low       | Low                       | Low               | Low           | Low                                  | Low                     | Low            | Low          |
| Speicher et al. 2014                      | Low       | Moderate                  | Low               | Moderate      | n.a.                                 | Moderate                | Moderate       | Moderate     |
| Wang et al. 2020                          | Low       | Low                       | Low               | Low           | Moderate                             | Low                     | Low            | Moderate     |

|                   |     |          |     |     |     |     |     |          |
|-------------------|-----|----------|-----|-----|-----|-----|-----|----------|
| Wang et al. 2019  | Low | Low      | Low | Low | Low | Low | Low | Low      |
| Wang et al. 2016  | Low | Moderate | Low | Low | Low | Low | Low | Moderate |
| Zhang et al. 2018 | Low | Low      | Low | Low | Low | Low | Low | Low      |

**Robotic pancreatoduodenectomy**

|                       |          |          |      |          |      |          |          |          |
|-----------------------|----------|----------|------|----------|------|----------|----------|----------|
| Beane et al. 2019     | Moderate | Low      | Low  | Moderate | n.a. | Moderate | n.a.     | Moderate |
| Boone et al. 2015     | Low      | Low      | Low  | Low      | Low  | Low      | Low      | Low      |
| Chen et al. 2015      | Low      | Low      | Low  | n.a.     | Low  | Low      | n.a.     | Low      |
| Guerra et al. 2018    | Moderate | Moderate | Low  | High     | n.a. | Moderate | Moderate | High     |
| Kim et al. 2020       | Low      | Low      | Low  | Low      | Low  | Low      | Low      | Low      |
| Marino et al. 2020    | Low      | Low      | Low  | Low      | Low  | Low      | n.a.     | Low      |
| Napoli et al. 2016    | Low      | Low      | n.a. | n.a.     | Low  | Low      | n.a.     | Low      |
| Rice et al. 2020      | Low      | Low      | Low  | n.a.     | Low  | Moderate | Moderate | Moderate |
| Schmidt et al. 2020   | Low      | Low      | Low  | Low      | Low  | Low      | Low      | Low      |
| Shi et al.            | Low      | Low      | Low  | Low      | Low  | Low      | Low      | Low      |
| Shyr et al. 2018      | Moderate | Low      | Low  | n.a.     | n.a. | Low      | Low      | Moderate |
| Takahashi et al. 2018 | Moderate | Moderate | Low  | n.a.     | n.a. | Moderate | Moderate | Moderate |
| Watkins et al. 2018   | Low      | Low      | Low  | n.a.     | Low  | Low      | Moderate | Moderate |
| Zhang et al. 2018     | High     | Moderate | Low  | Low      | n.a. | Moderate | n.a.     | High     |
| Zhang et al. 2019     | Moderate | Low      | Low  | n.a.     | n.a. | Low      | n.a.     | Moderate |
| Zhou et al.           | Low      | Low      | Low  | Low      | Low  | Low      | Low      | Low      |
| Zwart et al. 2021     | Low      | Low      | Low  | Low      | Low  | Low      | Low      | Low      |

**Laparoscopic distal pancreatectomy**

|                      |          |          |      |      |          |          |          |          |
|----------------------|----------|----------|------|------|----------|----------|----------|----------|
| Barga et al. 2012    | Moderate | Moderate | n.a. | n.a. | Low      | Low      | n.a.     | Moderate |
| Barrie et al. 2015   | Low      | Moderate | Low  | n.a. | n.a.     | Moderate | Moderate | Moderate |
| de Rooij et al. 2017 | Moderate | Moderate | Low  | n.a. | Moderate | High     | n.a.     | High     |
| de Rooij et al. 2016 | Low      | Low      | Low  | n.a. | Low      | Low      | Low      | Low      |
| Hasselgren et al.    | Low      | Low      | Low  | Low  | Low      | Low      | Low      | Low      |
| Kim et al. 2019      | Moderate | Low      | n.a. | n.a. | n.a.     | Moderate | Low      | Moderate |
| Kneuert et al. 2012  | Moderate | Low      | Low  | n.a. | Low      | Low      | Moderate | Moderate |
| Liao et al. 2020     | Low      | Moderate | Low  | Low  | Low      | Low      | Moderate | Moderate |
| Lof et al. 2019      | Low      | Low      | Low  | Low  | Low      | Low      | Low      | Low      |
| Malleo et al. 2014   | Low      | Low      | Low  | n.a. | Low      | Low      | Moderate | Moderate |
| Nachmany et al. 2016 | Moderate | Moderate | n.a. | n.a. | Low      | Low      | Low      | Moderate |
| Park et al.          | Low      | Moderate | Low  | Low  | Low      | Low      | Moderate | Moderate |
| Ricci et al. 2015    | Low      | Low      | Low  | n.a. | n.a.     | Moderate | Low      | Moderate |
| Sahakyan et al. 2021 | Low      | Low      | Low  | Low  | Moderate | Low      | Low      | Moderate |

**Robotic distal pancreatectomy**

|                       |          |          |     |      |      |     |          |          |
|-----------------------|----------|----------|-----|------|------|-----|----------|----------|
| Benizri et al. 2013   | Moderate | Low      | Low | n.a. | Low  | Low | Low      | Moderate |
| Klompaker et al. 2019 | Low      | Low      | Low | n.a. | n.a. | Low | Moderate | Moderate |
| Napoli et al. 2015    | Low      | Moderate | Low | n.a. | Low  | Low | Moderate | Moderate |
| Shakir et al. 2015    | Low      | Low      | Low | n.a. | n.a. | Low | Low      | Low      |
| Shyr et al. 2018      | Low      | Low      | Low | n.a. | Low  | Low | Moderate | Moderate |
